# Supplementary material
Source: PubMed Central journal article supplement (PMC4375088)
Supplement: NIHMS632400-supplement.pdf [file NIHMS632400-supplement.pdf]

| Protein                      | pdb ID | Information                                                                |
|------------------------------|--------|----------------------------------------------------------------------------|
| <b>Prorenin</b>              | 3vcm   | Crystal structure of human renin (2.93 Å) with pro-domain added into renin |
| <b>Prorenin</b>              | 4amt   | 2.6 Å crystal structure for human prorenin                                 |
| <b>Angiotensinogen (AGT)</b> | 2wxw   | Oxidized                                                                   |
|                              | 2wxx   | Oxidized                                                                   |
|                              | 2wxy   | Reduced                                                                    |
|                              | 2wxz   | C2 space group                                                             |
|                              | 2wy0   | Oxidized in P6122 space group                                              |
|                              | 2wy1   | P321 space group                                                           |
| <b>Renin</b>                 | 1rne   | Glycosylated and transition state analog inhibitor                         |
|                              | 1bbs   | Native                                                                     |
|                              | 2ren   | Native                                                                     |
|                              | 1hrn   | Polyhydroxymonoamide inhibitor                                             |
|                              | 1bil   | Butanediamide inhibitor                                                    |
|                              | 1bim   | Butanediamide inhibitor                                                    |
|                              | 2bks   | PF00074777 COMPLEX                                                         |
|                              | 2bkt   | PF00257567 COMPLEX                                                         |
|                              | 2fs4   | Ketopiperazine-Based Inhibitor (PZ1)                                       |
|                              | 2g1n   | Ketopiperazine-Based Inhibitor (11G)                                       |
|                              | 2g1o   | Ketopiperazine-Based Inhibitor (21G)                                       |
|                              | 2g1r   | Ketopiperazine-Based Inhibitor (31G)                                       |
|                              | 2g1s   | Ketopiperazine-Based Inhibitor (41G)                                       |
|                              | 2g1y   | Ketopiperazine-Based Inhibitor (51G)                                       |
|                              | 2g20   | Ketopiperazine-Based Inhibitor (L1A)                                       |
|                              | 2g21   | Ketopiperazine-Based Inhibitor (L1B)                                       |
|                              | 2g22   | Ketopiperazine-Based Inhibitor (61G)                                       |
|                              | 2g24   | Ketopiperazine-Based Inhibitor (71G)                                       |
|                              | 2g26   | Ketopiperazine-Based Inhibitor (3LG)                                       |
|                              | 2g27   | Ketopiperazine-Based Inhibitor (4LG)                                       |
|                              | 2i4q   | PF02342674                                                                 |
|                              | 2iko   | Ketopiperazine-Based Inhibitor (71G)                                       |
|                              | 2iku   | LIY                                                                        |
|                              | 2ii2   | LIX                                                                        |
|                              | 2v0z   | ALISKIREN                                                                  |
|                              | 2v10   | Inhibitor 9                                                                |
|                              | 2v11   | Inhibitor 6                                                                |
|                              | 2v12   | Inhibitor 8                                                                |
|                              | 2v13   | Inhibitor 7                                                                |
|                              | 2v16   | Inhibitor 3                                                                |
|                              | 3d91   | Remikiren                                                                  |
|                              | 3gw5   | Alkylamine inhibitor                                                       |
|                              | 3g6z   | Bioavailable Inhibitor                                                     |
|                              | 3g70   | Bioavailable Inhibitor                                                     |
|                              | 3g72   | Bioavailable Inhibitor                                                     |
|                              | 3km4   | Bioavailable Alkyl Amine Inhibitor                                         |
|                              | 3k1w   | Bioavailable Inhibitor                                                     |
|                              | 3oqf   | indole-piperazine inhibitor                                                |
|                              | 3oot   | indole-piperazine inhibitor                                                |
|                              | 3ooK   | indole-piperazine inhibitor                                                |
|                              | 3sfc   | Azaindole-3-Carboxamide                                                    |
|                              | 3oad   | Piperidine inhibitors                                                      |
|                              | 3oag   | Piperidine inhibitors                                                      |
|                              | 3o9l   | Piperidine inhibitors                                                      |
|                              | 3own   | Macrocyclic inhibitor                                                      |
|                              | 3q3t   | Alkyl Amine Inhibitor                                                      |
|                              | 3q4b   | Alkyl Amine Inhibitor                                                      |
|                              | 3q5h   | Alkyl Amine Inhibitor                                                      |
| <b>Renin-Agt</b>             | 2x0b   | Complexed together                                                         |
| <b>Ang I</b>                 | 1n9u   | Solution structure                                                         |
| <b>ACE N-term</b>            | 2c6f   | Native                                                                     |
|                              | 2c6n   | Lisinopril                                                                 |
|                              | 2xyd   | Phosphinic Tripeptide                                                      |
|                              | 3nxq   | RXP407 / Glycosylation mutant (Ndom389 / minimal for expression)           |
| <b>ACE C-term</b>            | 1o8a   | Native                                                                     |
|                              | 1o86   | Lisinopril                                                                 |
|                              | 2ydm   | Selenium analogue of Captopril                                             |
|                              | 1uzf   | Captopril                                                                  |
|                              | iuze   | Enalaprilat                                                                |
|                              | 2oc2   | RXPA380                                                                    |
|                              | 2iux   | G1234 mutant                                                               |
|                              | 2iul   | G13 mutant                                                                 |
|                              | 2xy9   | Phosphinic Tripeptide                                                      |
|                              | 3bkk   | Ketone ACE inhibitor kAF                                                   |
|                              | 3bkl   | Ketone ACE inhibitor kAW                                                   |
|                              | 3l3n   | lisW                                                                       |
|                              | 4aph   | Ang II                                                                     |
|                              | 4apj   | BPPb                                                                       |
| <b>Ang II</b>                | 1n9v   | Solution structure                                                         |
| <b>ACE2</b>                  | 1r42   | Native                                                                     |
|                              | 1r4l   | MLN-4760                                                                   |
|                              | 3sci   | spike protein from SARS coronavirus (human) complexed                      |
|                              | 3scj   | spike protein from SARS coronavirus (civet) complexed                      |
|                              | 2ajf   | spike protein from SARS coronavirus complexed                              |
|                              | 3d0g   | 2002-2003 spike protein from SARS coronavirus (human) complexed            |
|                              | 3d0h   | 2002-2003 spike protein from SARS coronavirus (civet) complexed            |
|                              | 3d0i   | 2005-2006 spike protein from SARS coronavirus (civet) complexed            |
|                              | 3scK   | spike protein from SARS coronavirus (civet) complexed                      |
|                              | 3scl   | spike protein from SARS coronavirus (epidemic strain) complexed            |
|                              | 3kbh   | NL63 respiratory coronavirus                                               |
| <b>Ang-(1-7)</b>             | 2jp8   | Solution structure                                                         |
| <b>Nepriysin</b>             | 1r1h   | Crystal structure of Nep (1.95 Å resolution)                               |
| <b>PRCP</b>                  | 3n2z   | Crystal structure of Prolylcarboxypeptidase (2.8 Å Resolution)             |

**Table S1 Known PDB protein structures of the renin angiotensin system**

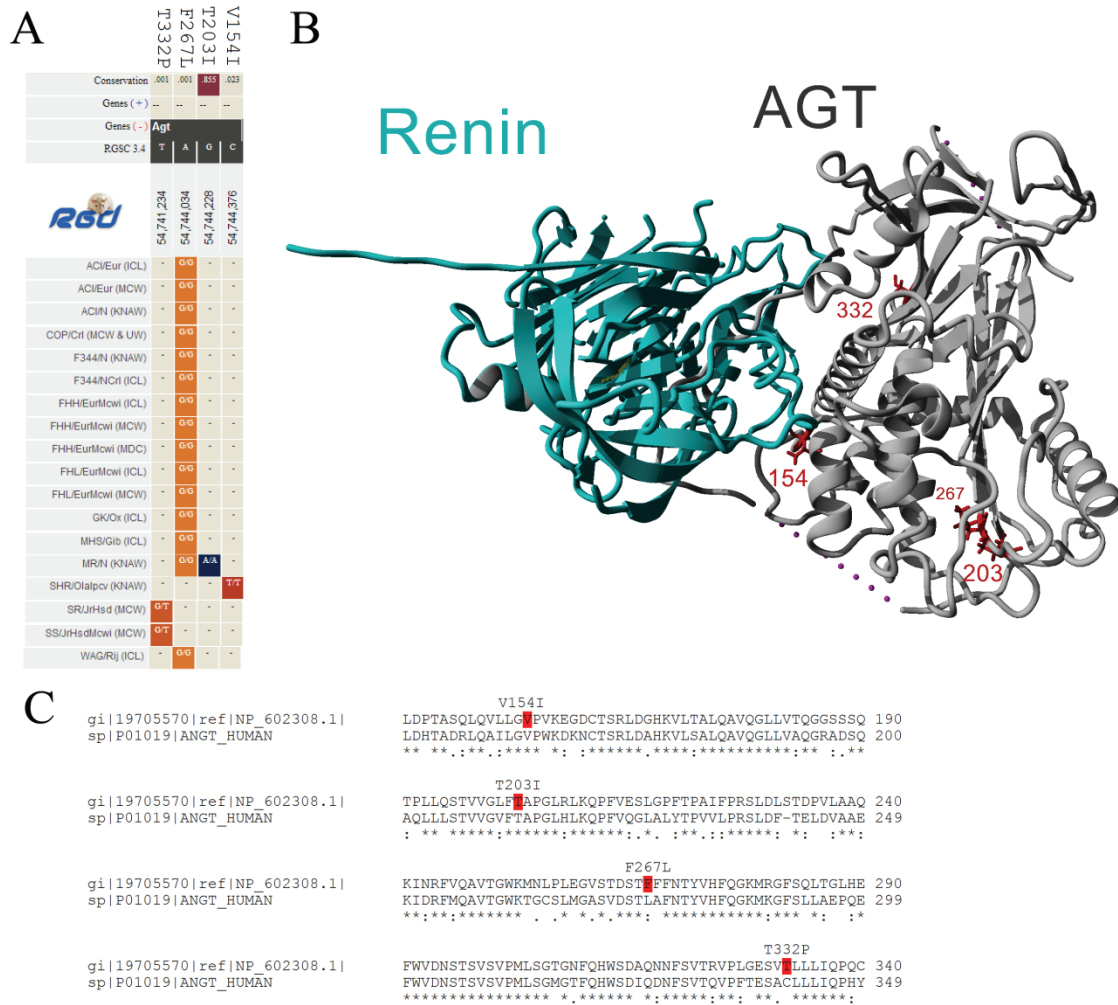

**Figure S1 Variations in rat Angiotensinogen (AGT).** Nonsynonymous variations found in Angiotensinogen in the 51 curated rat genomes of the MCW RGD database. **A)** Four amino acids were identified to have variations (mostly homozygous changes, G/G, as opposed to heterozygous, G/T) from the reference rat genome alleles (gray box) leading to amino acid changes identified on the top. **B)** Each amino acid was mapped onto the structure of Renin-AGT interaction. Amino acid 154 is found on the binding interface of the two proteins, while 203 and 267 were clustered in internal packing. **C)** Sequence alignment of the reference rat sequence with human, showing conservation of 154 and 203. This suggests that the change to amino acid 154 from a valine to an isoleucine may have functional alterations in the interaction between AGT and Renin.

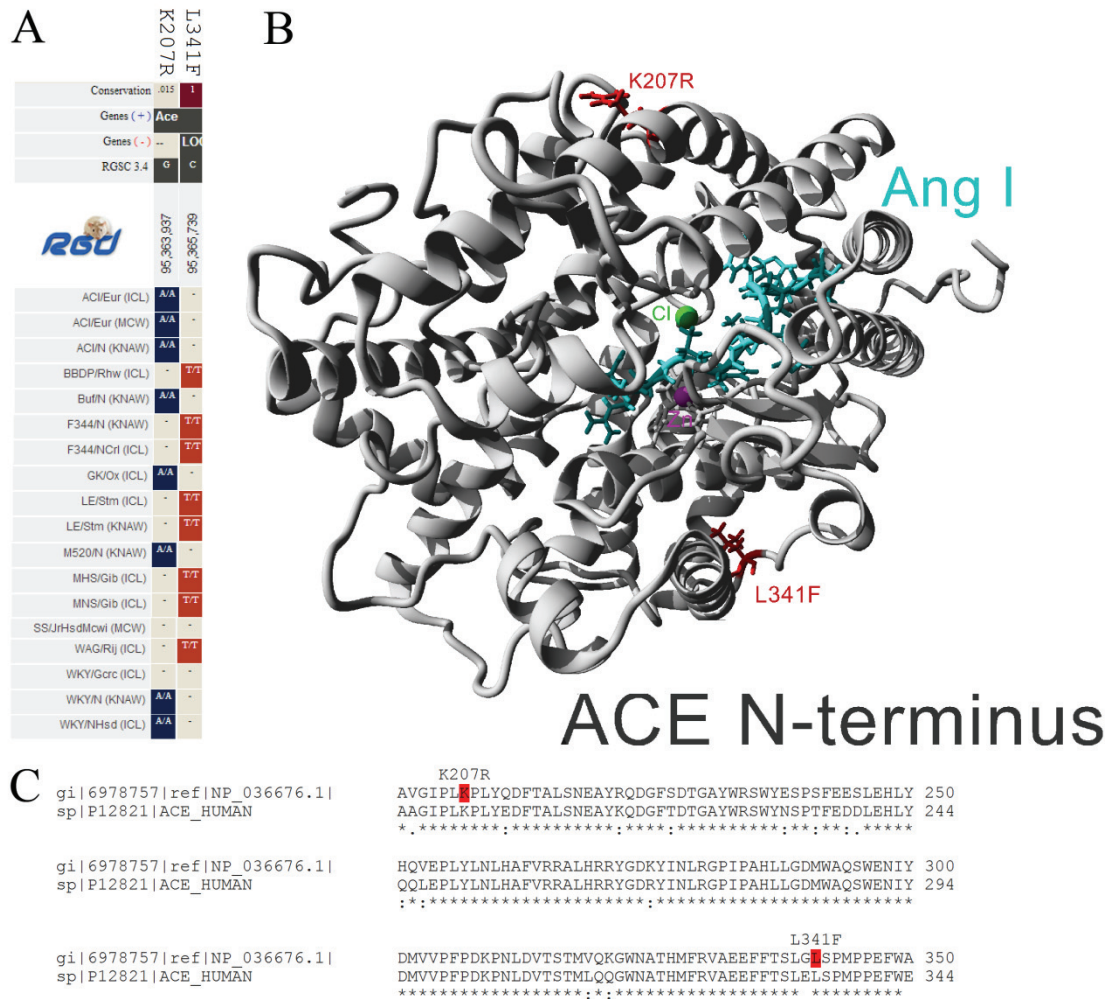

**Figure S2 Variations in rat ACE.** Nonsynonymous variations found in ACE in the 51 curated rat genomes in the MCW RGD database. **A)** Two amino acids were identified to have variations from the reference rat genome alleles (gray box) leading to amino acid changes identified on the top. **B)** Each amino acid was mapped onto the structure of the native ACE N-terminus (gray). Both amino acid changes are outside of the Zn active site (magenta) and Ang I (cyan) binding. **C)** Sequence alignment of the reference rat sequence with human, showing conservation of 207 and 341. These amino acids may alter the interaction of the N-terminus with the C-terminus or other yet to be identified proteins, but these contacts are beyond the assessment of this study.

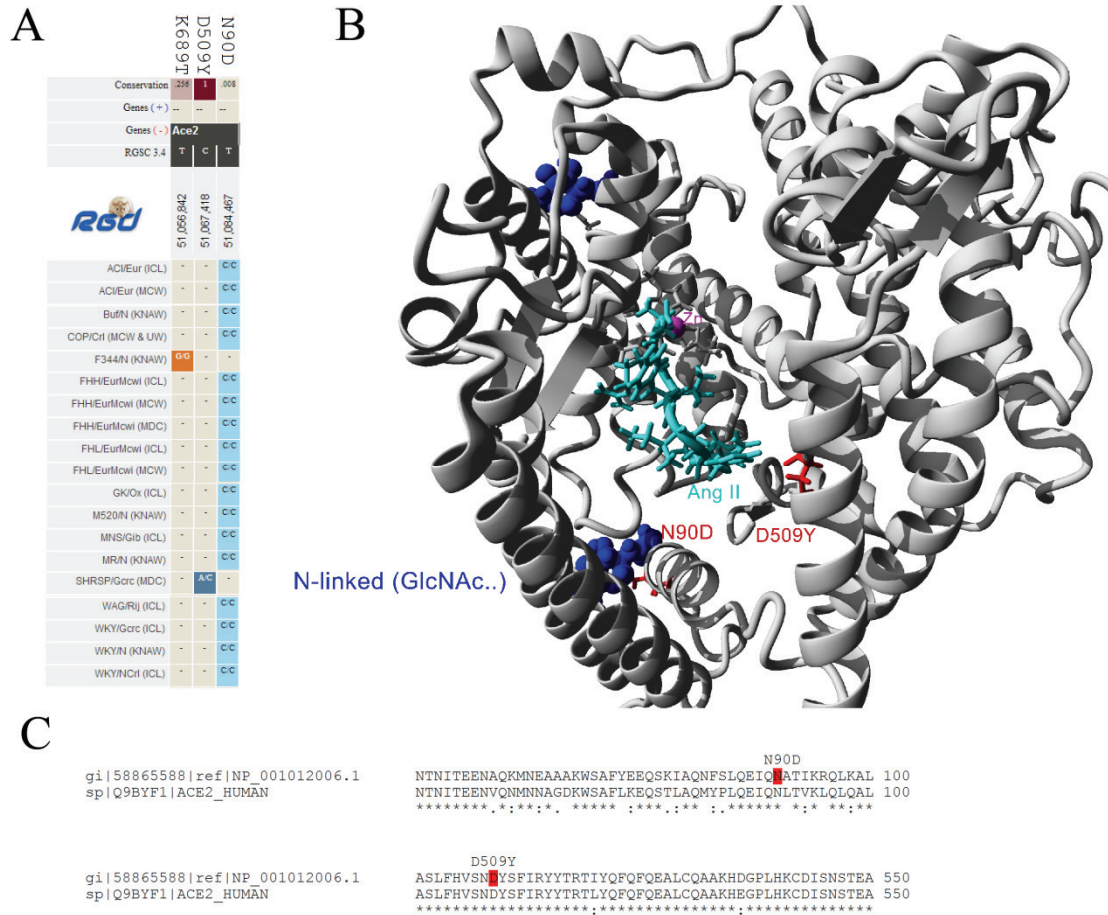

**Figure S3 Variations in rat ACE2.** Nonsynonymous variations found in ACE2 in the 51 curated rat genomes in the MCW RGD database. **A)** Three amino acids were identified to have variations from the reference rat genome alleles (gray box) leading to amino acid changes identified on the top. Two of these variations mapped to the main enzyme domain. **B)** Each amino acid was mapped onto the structure of the native ACE2 (gray). Amino acid 90 is known to contain an N-linked glycosylation important for cell secretion. The second amino acid change (509) occurs close to the Zn active site (magenta) and Ang II binding (cyan) located on the second arm of ACE2. These both have a high probability of altering enzyme function. **C)** Sequence alignment of the reference rat sequence with human, showing conservation of 90 and 509. All of this data suggest a high probability for alterations in function due to these variations.

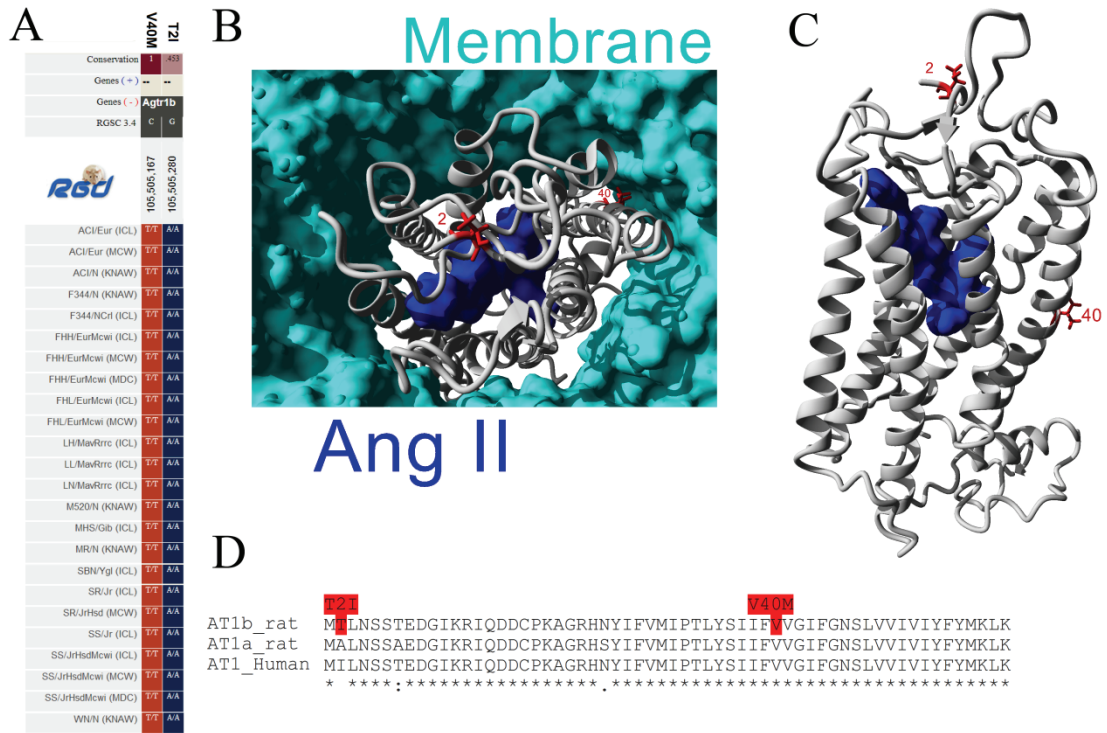

**Figure S4 Variations in rat AT1b.** Nonsynonymous variations found in AT1b in the 51 curated rat genomes in the MCW RGD database. **A)** Two amino acids were identified to have variations from the reference rat genome alleles (gray box) leading to amino acid changes identified on the top. **B-C)** Each amino acid was mapped onto the modeled structure of AT1 with **(B)** or without **(C)** a lipid membrane. Amino acid 2 is found in the N-terminal segment while 40 is located in the middle of helix 1 at a site of membrane (cyan) contact. Changes to amino acid 40 have the potential to result in restructuring of the helix and alteration of contact with the Ang II peptide (blue). **D)** Sequence alignment of the rat AT1a and AT1b of rat to AT1 of human, showing conservation of amino acid 40 and not 2. This suggests that amino acid 40 variations may alter the function of AT1b.

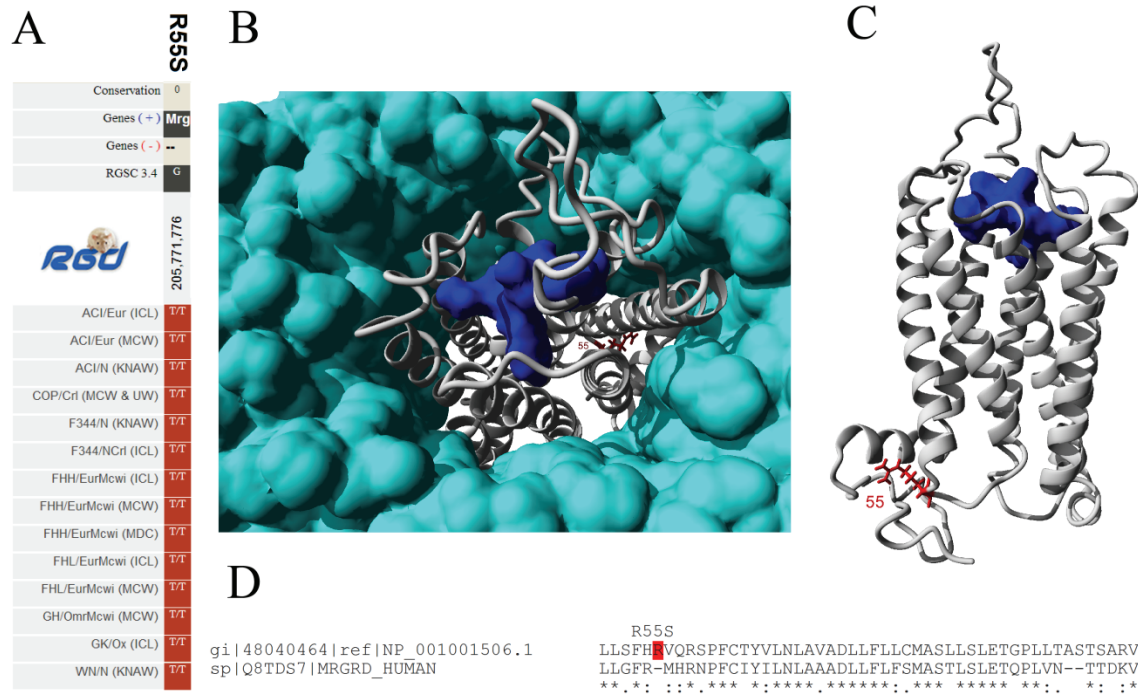

**Figure S5 Variations in rat MRGD.** Nonsynonymous variations found in MRGD in the 51 curated rat genomes in the MCW RGD database. **A**) One amino acid was identified to have variation from the reference rat genome allele (gray box) leading to amino acid change identified on the top. **B-C**) This amino acid was mapped onto the modeled structure of MRGD with **(B)** or without **(C)** a lipid membrane. Amino acid 55 is found on the intracellular end of the first helix. **D**) Sequence alignment of the reference rat with human, showing variation at amino acid 55. This suggests minimal role of variation at this site.

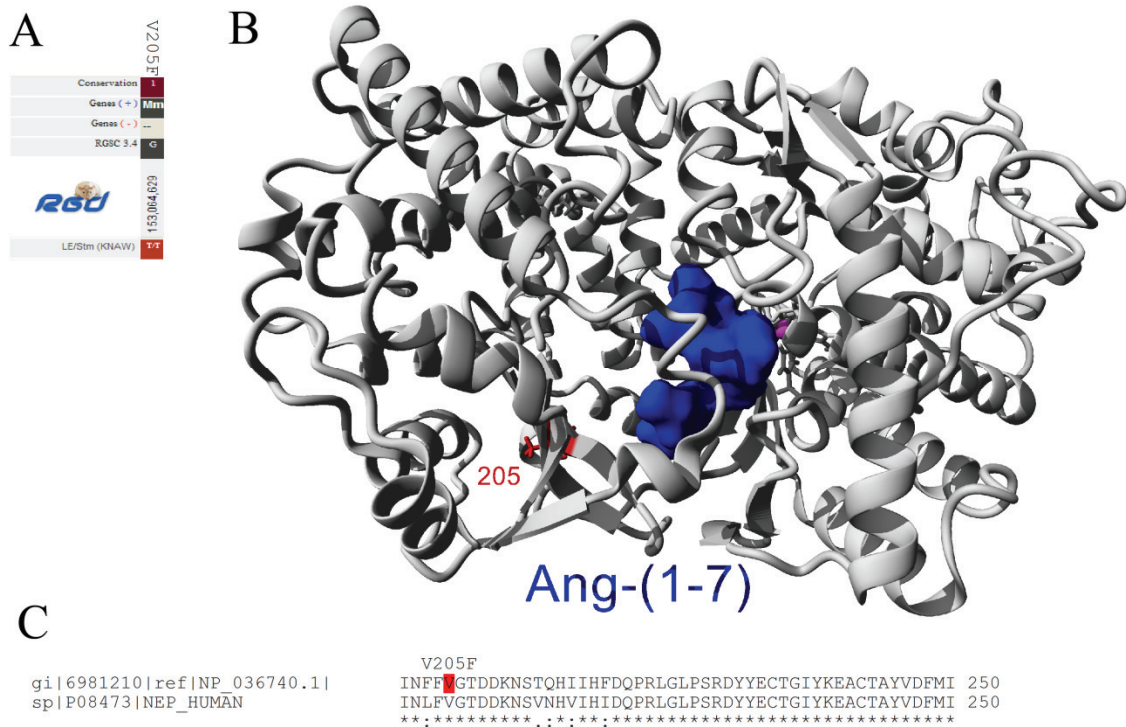

**Figure S6 Variations in rat Neprilysin.** Nonsynonymous variations found in Neprilysin (from the *MME* gene) in the 51 curated rat genomes in the MCW RGD database. **A)** One amino acids was identified to have variation from the reference rat genome allele (gray box) leading to amino acid change identified on the top. **B)** Amino acid 205 is located away from the Zn active site (magenta) and Ang-(1-7) binding based on the structures for Neprilysin. **C)** Sequence alignment of the reference rat sequence with human, showing conservation of amino acid 205. This data suggests a high probability for slight alterations in domain packing due to the increase bulk of the phenylalanine side chain as opposed to the valine, but minimal contributions of altering the Zn binding region and function of the protein.

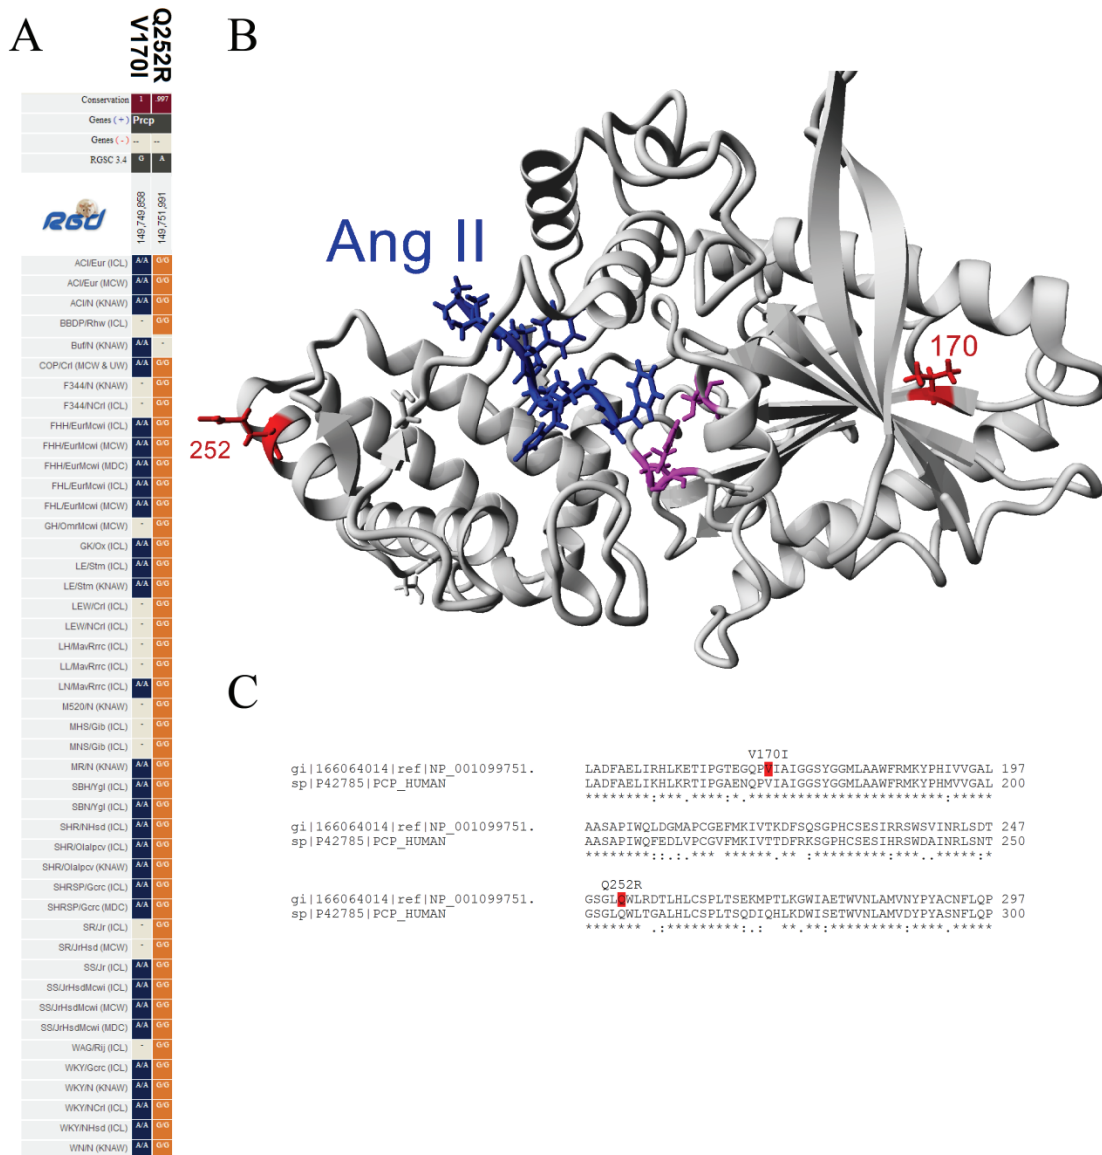

**Figure S7 Variations in rat PRCP.** Nonsynonymous variations found in PRCP in the 51 curated rat genomes in the MCW RGD database. **A)** Two amino acids were identified to have variations from the reference rat genome allele (gray box) leading to amino acid changes identified on the top. **B)** Each amino acid was mapped onto the structure of the PRCP, both away from the active site residues (magenta) and Ang II (blue) binding. **C)** Sequence alignment of the reference rat sequence with human, showing conservation of 170 and 252. Amino acid 170 would likely maintain proper hydrophobic packing with the V170I change. The Q252R has the potential to alter the surface environment for altered interactions with proteins outside the scope of this study.
